# Supplementary material for: Impact of Satellite-Based Ice Surface Temperature Initialization on Arctic Winter Forecasts Using the Korean Integrated Model
Source: Copernicus journal article supplement (doi:10.5194/egusphere-2025-2071), 2025-05-21
Supplement: Supplementary file [file egusphere-2025-2071-AC2-supplement.pdf]

Dear Executive and Topical Editors,

Thank you very much for your kind reply and clarification.

1. We have re-confirmed the institutional policy by contacting the Korea Meteorological Administration (KMA) regarding the external availability of the KIM source code. KMA has stated that, in accordance with the *National Research and Development Innovation Act*, KIM is currently not subject to public release during the ongoing development phase, and that the decision regarding its future disclosure will be made upon the completion of development.

The relevant legal basis, the *National Research and Development Innovation Act*, is available only in Korean. For your reference, the official link to the law is provided below:

<https://www.law.go.kr/lsInfoP.do?lsId=013774&ancYnChk=0#0000>

2. KIM has been undergoing an advanced development program since 2020, led by the Korea Institute of Atmospheric Prediction Systems (KIAPS), and officially entered operational service in 2022 as Korea's national NWP system. As the national forecasting infrastructure, the KIM is securely and systematically archived to ensure long-term preservation, version integrity, and sustainable operational maintenance.

We respectfully request your understanding in this regard.

Best regards,

Eui-Jong Kang
